# Supplementary material for: Technical Note: two-component Electrical Conductivity-based hydrograph separaTion employing an EXPonential mixing model (EXPECT) provides reliable high temporal resolution young water fraction estimates in three small Swiss catchments
Source: Copernicus journal article supplement (doi:10.5194/egusphere-2023-1797), 2023-09-05
Supplement: Supplementary file 1 [file egusphere-2023-1797-supplement.pdf]

# Supplementary material - Technical Note: two-component *Electrical Conductivity*-based hydrograph separation employing an *EXponential* mixing model (*EXPECT*) provides reliable high temporal resolution young water fraction estimates in three small Swiss catchments

Alessio Gentile<sup>1</sup>, Jana von Freyberg<sup>2,3</sup>, Davide Gisolo<sup>1</sup>, Davide Canone<sup>1</sup>, and Stefano Ferraris<sup>1</sup>

<sup>1</sup>Interuniversity Department of Regional and Urban Studies and Planning (DIST), Politecnico and Università degli Studi di Torino, 10125, Torino, Italy

<sup>2</sup>School of Architecture, Civil and Environmental Engineering, EPFL, 1015, Lausanne, Switzerland

<sup>3</sup>Mountain Hydrology and Mass Movements, Swiss Federal Institute for Forest, Snow and Landscape Research (WSL), 8903, Birmensdorf, Switzerland

Correspondence to: Alessio Gentile (alessio.gentile@polito.it)

## Summary:

This document contains a focus about the discharge sensitivity estimation following the approach used by Gallart et al. (2020b). Figure S1 shows the daily  $F_{yw}^{opt}$  timeseries of the three-study catchment with indication of local maxima/minima (left panels) and the distribution of  $F_{yw}^{opt}$  rising/falling limbs length (right panels).

## The discharge sensitivity of young water fraction

The seasonal isotope cycles in precipitation  $c_P(t)$  (‰) and in streamflow  $c_S(t)$  (‰) can be modelled using a sinusoid function, as reported in Eq. (S1) and Eq. (S2):

$$c_P(t) = A_P \sin(2\pi ft - \phi_P) + k_P, \quad (S1)$$

$$c_S(t) = A_S^{(*)} \sin(2\pi ft - \phi_S^{(*)}) + k_S^{(*)}, \quad (S2)$$

where  $A_P$  and  $A_S$  are the amplitudes (‰) of seasonal isotope cycles,  $f$  is the frequency of the cycle ( $1 \text{ y}^{-1}$ ),  $t$  is time (decimal years),  $\phi_P$  and  $\phi_S$  are the phases (rad) of seasonal cycles and  $k_P$  and  $k_S$  are the vertical shift (‰) of the seasonal cycles. The symbol “\*” refers to a streamflow-weighted variable. The coefficients  $A_P$ ,  $\phi_P$ ,  $k_P$  can be obtained by fitting volume-weighted Eq. (S1) on precipitation isotopic composition  $c_P(t)$  using iteratively re-weighted least squares (IRLS), a robust estimation method that minimizes the influence of outliers. By using the same technique, the coefficients  $A_S^{(*)}$ ,  $\phi_S^{(*)}$ ,  $k_S^{(*)}$  can be obtained by fitting (unweighted or flow-weighted) Eq. (S2) on streamwater isotopic composition  $c_S(t)$ . The amplitude ratio  $A_S^{(*)}/A_P$  can be used to estimate the time-weighted or flow-weighted average fraction ( $F_{yw}$  or  $F_{yw}^*$ ) of water younger than a threshold age ( $\tau_{yw}$ ). For a wide range of transit time distributions,  $\tau_{yw}$  is approximately  $2.3 \pm 0.8$  months (Kirchner, 2016a).

In order to understand the statistical sensitivity of  $F_{yw}^*$  to  $Q$ , Gallart et al. (2020b) assume an exponential-type  $F_{yw}^*(Q)$  relationship that converges toward 1 (i.e. streamflow is composed entirely of young water) at the highest flows, as reported in Eq. (S3):

$$A_S^*(Q) = A_P F_{yw}^*(Q) = A_P [1 - (1 - F_0^*) \exp(-Q S_d^*)], \quad (S3)$$

By inserting Eq. (S3) into Eq. (S2) yields:

$$c_S(Q, t) = A_P [1 - (1 - F_0^*) \exp(-Q S_d^*)] \sin(2\pi f t - \varphi_S^*) + k_S^* , \quad (\text{S4})$$

Where  $S_d^*$  ( $Q^{-1}$ ) is called the discharge sensitivity of the young water fraction and  $F_0^*$  (-) is the virtual young water fraction for  $Q = 0$ . Such parameters can be estimated by fitting flow-weighted Eq. (S4) on streamwater isotopic composition  $c_S(t)$  using IRLS method.

$F_{yw}^{opt}$  timeseries with analysis of the  $F_{yw}^{opt}$  rising/falling limbs duration

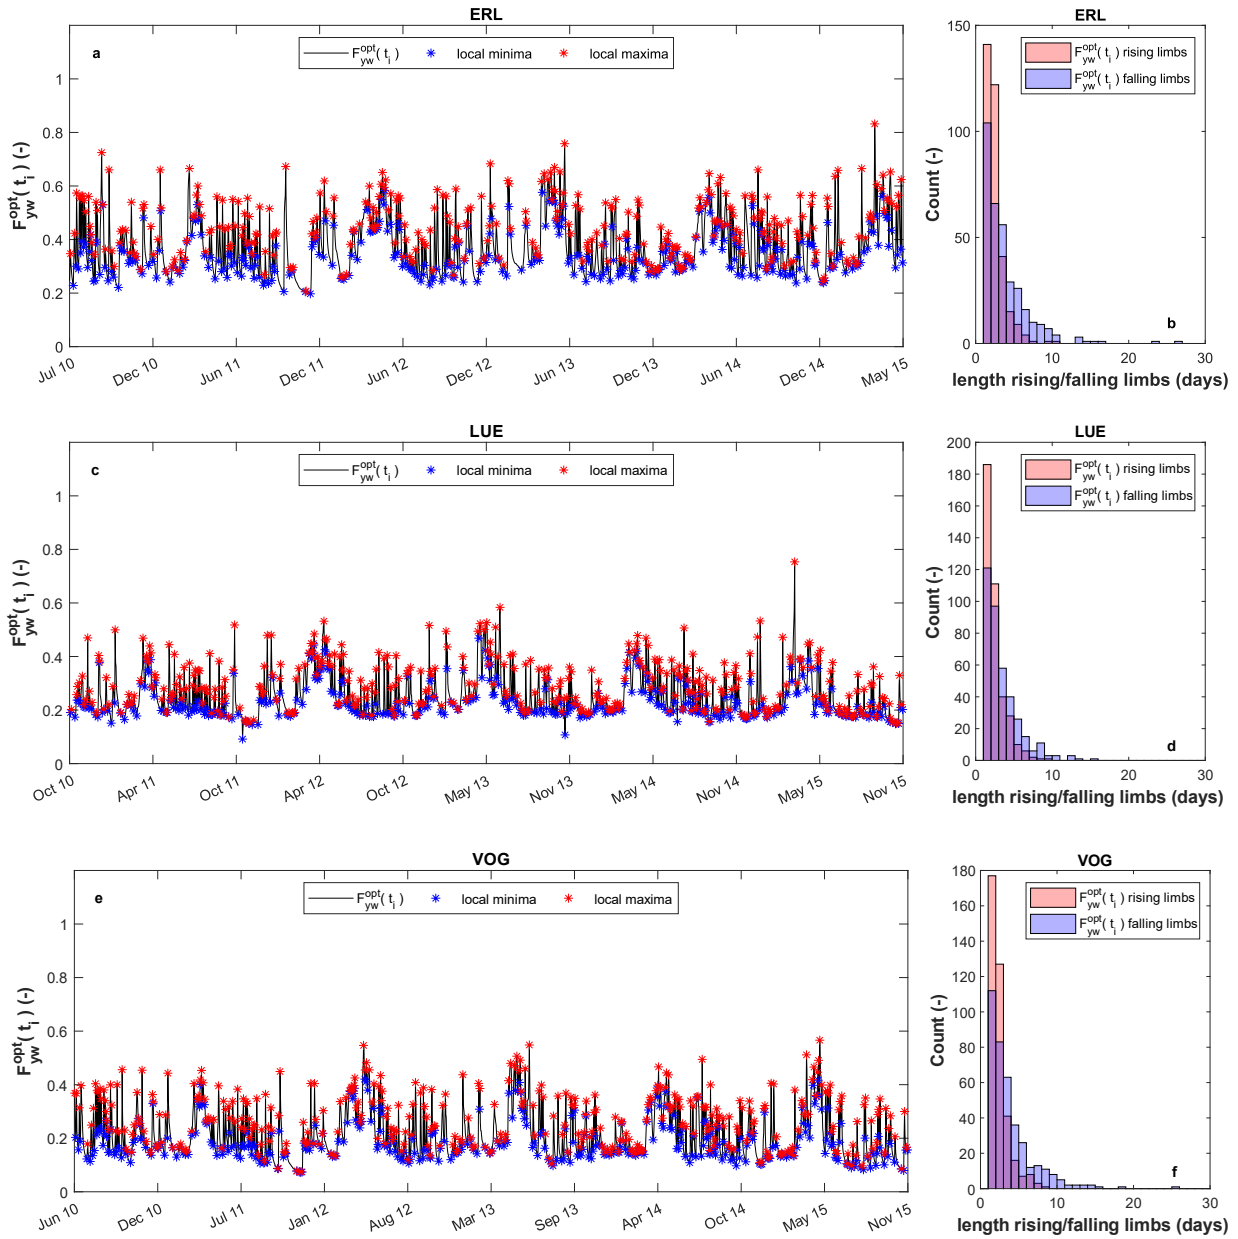

Figure S1. Daily  $F_{yw}^{opt}$  timeseries of the three-study catchment with indication of local maxima/minima (panels a,c,e) and distribution of  $F_{yw}^{opt}$  rising/falling limbs length (panels b,d,f). These distributions indicate that  $F_{yw}^{opt}$  rapidly increases after an event, while it recedes slower during no-input days.
