# Supplementary material for: Technical Note: two-component Electrical Conductivity-based hydrograph separaTion employing an EXPonential mixing model (EXPECT) provides reliable high temporal resolution young water fraction estimates in three small Swiss catchments
Source: Copernicus journal article supplement (doi:10.5194/egusphere-2023-1797), 2023-09-05
Supplement: Supplementary file [file egusphere-2023-1797-AC1-supplement.pdf]

1 Dear Anonymous Referee #1,

2 We thank you for your appreciation about our effort in developing a multi-tracer method  
3 for advancing the knowledge of young water in catchment hydrology. We thank you for  
4 your comments, also if, in our opinion, the method has not been fully understood.

5 We think that many of the criticisms made should be supported by scientific results in  
6 the literature to bring substance to the discussion. In this regard we answered point-by-  
7 point to your comments by citing published works that support our assumptions and  
8 methodology. Moreover, many problems that have been listed have already been  
9 addressed by the authors along the manuscript.

10 Perhaps, we will have to clarify some points better and we will be glad to do so in the  
11 revised version of the manuscript if we receive a positive editor's response.

12 Accordingly, we kindly ask to reconsider the decision of not-recommending the  
13 manuscript for publication in light of our answers.

14 With kind regards,

15 The Authors

16 1. Hydrograph components, i.e. the event and pre-event water, do not represent young  
17 and old water fractions defined by the young water fraction concept.

18 Please, note that we are not subdividing the hydrograph into event water and pre-event  
19 water. This can be done by applying a time-source separation with the only use of stable  
20 water isotopes as tracer (Klaus and McDonnell, 2013). This cannot be done with  
21 geochemical tracers like ECs.

22 What we actually do is partially described in Kirchner (2016b):

23 *“The young water fraction  $F_{yw}$  may also be helpful in inferring chemical processes*  
24 *from streamflow concentrations of reactive chemical species. Many reactive species*  
25 *exhibit clear concentration–discharge relationships. Because one can determine how*  
26  *$F_{yw}$  varies, on average, across different ranges of discharge, one can potentially*  
27 *construct mixing relationships between  $F_{yw}$  and the concentrations of reactive*  
28 *species. If the measurable range of  $F_{yw}$  is wide enough, one may even be able to*  
29 *estimate the end-member concentrations corresponding to idealized “young water”*  
30 *( $F_{yw} = 1$ ) and “old water” ( $F_{yw} = 0$ )”*

31 Accordingly, what we did is to construct a mixing relationship between  $F_{yw}$  and the  
32 concentrations of reactive species (integrated in the ECs measure): the exponential decay  
33 of ECs with increasing  $F_{yw}$  (see Eq. 5 of the preprint). From this mixing relationship, we  
34 can separate the hydrograph in young water and old water by choosing appropriate end-

35 members. If possible, one could potentially measure the EC of young water (< 2-3 months)  
 36 and old water (> 2-3 months) in the stream when flow specific young water fractions are  
 37 equal to 1 or 0, respectively (Kirchner, 2016b). Since the flow conditions in which  $F_{yw} = 1$   
 38 or  $F_{yw} = 0$  are rare scenarios (see line 189-193 of the preprint), we obtain the two EC end-  
 39 members through calibration because we have additional information deriving from  
 40 stable water isotopes that we can use to constrain the two end-members: the flow-  
 41 weighted average young water fraction ( $F_{yw}^*$ ) and the time-weighted average young water  
 42 fraction ( $F_{yw}$ ) (both obtained with the amplitude ratio approach). The calibrated optimal  
 43  $EC_{ow}$  and  $EC_{yw}$  we have obtained are respectively higher and lower than the maximum  
 44 and minimum  $EC_S$  measured in the stream, thus suggesting that they are the idealized old  
 45 water ( $F_{yw} = 0$ ) and young water ( $F_{yw} = 1$ ) EC endmembers (see lines 256-263 of the  
 46 preprint).

47 Another way to obtain the endmembers, by strictly following Kirchner (2016b), is to look  
 48 at how flow-specific young water fractions vary with the selected tracer ( $EC_S$  in this case)  
 49 measured in the same flow-regime. We report hereafter flow-specific  $EC_S$  (median values)  
 50 against flow-specific young water fractions for the three study catchments (Fig. 1). First,  
 51 we observe a non-linear relationship that confirms the mixing relationship presented in  
 52 the Eq. (5) of our manuscript (i.e., an exponential decrease of  $EC_S$  with increasing  $F_{yw}$ ).  
 53 Second, by fitting an exponential model on data we can obtain the end-members ( $EC_{ow}$   
 54 and  $EC_{yw}$ ) values evaluating the  $EC_S(F_{yw})$  equation for  $F_{yw} = 0$  and  $F_{yw} = 1$ . The main  
 55 problem is that these end-members would be highly uncertain since the curve is poorly  
 56 constrained at very low and very high  $F_{yw}$  (see Fig. 1).

57 We did not insert this analysis in the manuscript, but we are glad to add it in the revised  
 58 version to better clarify our method.

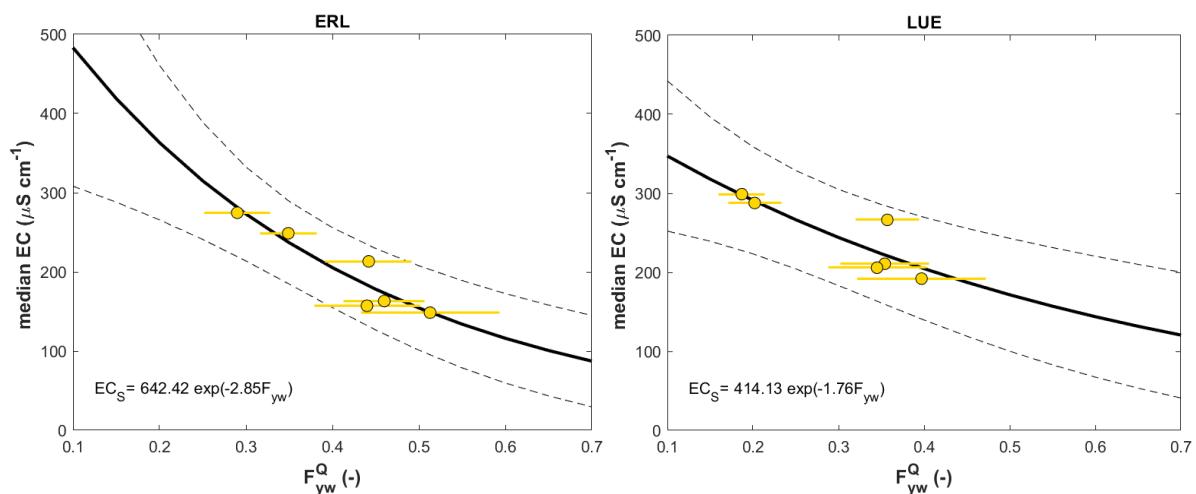

59

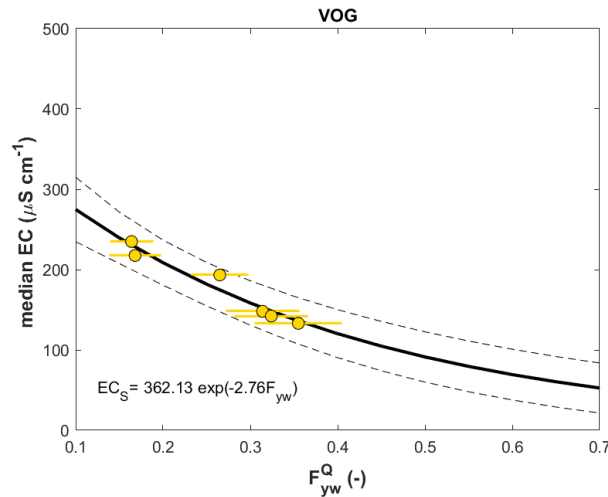

60

61 *Fig.1 Median flow-specific  $EC_S$  against flow-specific  $F_{yw}$  for the three study catchments. Horizontal bars indicate*  
 62 *the flow-specific  $F_{yw}$  standard error. The black curve indicates the exponential fit, while the dashed black lines*  
 63 *indicate the 90% prediction bounds.*

64 **In summary, we do not separate the hydrograph by using the stable water isotopes (thus**  
 65 **obtaining event water and pre-event water). We separate the hydrograph by using ECs**  
 66 **and by calibrating the EC end-members to reflect the age of the two components (young**  
 67 **water and old water). We can rewrite lines from 165 to 172 of the preprint to clarify this**  
 68 **point better.**

69 **In light of this clarification, we think that your first comment is derived from a**  
 70 **misunderstanding of the hydrograph separation we actually did and how we have**  
 71 **operated to perform it. Of course, event and pre-event water do not represent young and**  
 72 **old water. Event water is a portion of young (< 2-3 months) water while old (> 2-3 months)**  
 73 **water is a portion of pre-event water.**

74 2. The conceptual problem in my opinion is that if the young water fraction is defined as  
 75 a characteristic (metric) calculated from the seasonal variability of a tracer, it is attributed  
 76 to the seasonal time scale. Thus, it is not meaningful to “improve” the temporal resolution  
 77 of such a characteristic for finer scales (hydrographs) if the tracer streamflow data is  
 78 sparse.

79 **There is no conceptual problem in our method. We have obtained a young water fraction**  
 80 **timeseries (at daily or sampling resolution) so that its (unweighted) average is equal to**  
 81  **$F_{yw}$  and its flow-weighted average is equal to  $F_{yw}^*$  and these are the definitions of  $F_{yw}$  and**  
 82  **$F_{yw}^*$  obtained from seasonal tracer cycles. See the quote from Kirchner (2016b):**

83 ***“Flow-weighted fits to the seasonal tracer cycles accurately predict the flow-weighted***  
 84 ***average  $F_{yw}$  in streamflow, while unweighted fits to the seasonal tracer cycles***  
 85 ***accurately predict the unweighted average  $F_{yw}$ ”***

86 **Of course, the young water fraction is calculated from seasonal tracer cycles as a**  
 87 **characteristic at the seasonal time scale. However, “the fraction of runoff with transit**

88 times of less than roughly 2-3 months (Kirchner, 2016a)” is a definition that could be  
89 applied also to finer scales. Since the young water fraction calculated from seasonal tracer  
90 cycles is an average value (Kirchner 2016a, b) over the period of isotope sampling, it  
91 depends on the young water fractions we have in the hydrograph at each (finer) time-step  
92 over the period of isotope sampling. Accordingly, it is very useful to improve the temporal  
93 resolution of young water fraction estimation: this gives additional information on the  
94 hydrological processes and conditions occurring in a catchment that cannot be perceived  
95 at the seasonal time scale and that can potentially explain the low or high average young  
96 water fraction value.

97 Moreover, we would not say that “is meaningful to improve the temporal resolution of  
98 such a characteristic for finer scales” since previous papers in the scientific literature  
99 have addressed the problem of understanding how the young water fraction varies with  
100 different flow regimes, and thus over time (e.g. by using automatic water samples  
101 triggered by time and by flow, see Gallart et al. 2020a, 2020b). In this regard, von  
102 Freyberg et al. (2018) and, subsequently, Gallart et al. (2020b) worked on the sensitivity  
103 of young water fraction to discharge ( $Q$ ), the latter considered as a proxy of the catchment  
104 wetness. By studying how the young water fraction changes with  $Q$  is implicitly an  
105 investigation of how the young water fraction varies over time since  $Q$  varies over time.  
106 In this regard, we report here a quote of von Freyberg et al. (2018) paper: “*In individual  
107 catchments, one would also expect young water fractions (and thus seasonal isotope cycles)  
108 to be variable in time, i.e. to be larger during periods of stronger precipitation forcing and  
109 wetter antecedent conditions, as shallower, faster flow paths become more dominant, and as  
110 the stream network extends farther into the landscape, shortening the average path length  
111 of subsurface flow (Godsey and Kirchner, 2014).*”

112 Please, note that the method used to estimate the so-called discharge sensitivity of young  
113 water fraction has been designed to be applied in catchments in which tracer streamflow  
114 data is sparse. In this regard, again, we report here a quote of von Freyberg et al. (2018)  
115 paper: “*...we calculated the linear slope of the relationship between  $Q$  and  $F_{yw}$ , using a  
116 method that does not require breaking the streamwater isotope time series into separate flow  
117 regimes (and thus has more modest data requirements...)*”

118 3. **\*EC is not a conservative tracer** although it is generally true that the longer the  
119 water stays in the catchment, the more ions it contains. However, EC varies also with  
120 air (water) temperature despite temperature compensation employed in the sensors  
121 and if an event water meets very soluble minerals, it can have high EC as well.

122 About the combined use of not conservative tracers and the young water fraction, please  
123 see, again, the quote from Kirchner (2016b):

124 *“The young water fraction  $F_{yw}$  may also be helpful in inferring chemical processes  
125 from streamflow concentrations of reactive chemical species. Many reactive species  
126 exhibit clear concentration–discharge relationships. Because one can determine how*

127 *F<sub>yw</sub> varies, on average, across different ranges of discharge, one can potentially*  
128 *construct mixing relationships between F<sub>yw</sub> and the concentrations of reactive*  
129 *species. If the measurable range of F<sub>yw</sub> is wide enough, one may even be able to*  
130 *estimate the end-member concentrations corresponding to idealized “young water”*  
131 *(F<sub>yw</sub> = 1) and “old water” (F<sub>yw</sub> = 0)”.*

132 \*According to Kirchner (2016b), we do not need a conservative tracer to construct a  
133 mixing relationship with F<sub>yw</sub>. Thus, we do not understand why you think it is incorrect to  
134 use ECs.

135 Of course, the use of ECs has some limitations, but we have been extremely transparent  
136 about this: we have dedicated the whole section 3.3 of the manuscript regarding the  
137 limitations of the *EXPECT* method (including the limitations of ECs as a tracer).  
138 Accordingly, the application of the *EXPECT* method, as it is, could be critical in some  
139 catchments with very soluble minerals (please, note that we have underlined this  
140 limitation in the paper, see lines 353-357 of the preprint), but could be successful in many  
141 other catchments (like the three alpine catchments investigated in this work).

142 In conclusion, we think that is crucial to underline the limitations of ECs as a tracer (as  
143 we did in the section 3.3 of the preprint) to separate the young water from the old water,  
144 but that it is wrong to say that it cannot be used since it is not a conservative tracer.

145 We can integrate in section 3.3 of the manuscript the influence of air (water) temperature  
146 on ECs despite temperature compensation employed in the sensors, as you have  
147 suggested. Thank you for this.

148 4. Exponential relationship\* between EC and discharge (increasing event water\*\*  
149 contribution) appears when the long-term data (combining many events) is analysed.  
150 However, measurements I have seen\*\*\* did not document such a relationship for  
151 individual runoff events (hydrographs). While generally the EC does decrease with  
152 increasing discharge for many events, it does not happen so for each event. In fact, in  
153 my experience a decrease in EC with increase in discharge was evident only during  
154 larger events\*\*\*\*. Thus, it is in my opinion incorrect to apply the general relationship  
155 emerging from the long-term data for all individual events.

156 \*If possible, please indicate the equation number of the relationship you are referring to  
157 since it is unclear. If you are referring to Eq. (5), please note that ECs(*t<sub>i</sub>*) decreases  
158 exponentially with increasing F<sub>yw</sub>(*t<sub>i</sub>*) (since we construct a mixing relationship between  
159 F<sub>yw</sub>(*t<sub>i</sub>*) and ECs(*t<sub>i</sub>*), Kirchner, 2016b), but we do not have discharge in the equation.  
160 Accordingly, we are not assuming that ECs(*t<sub>i</sub>*) decreases with increasing Q(*t<sub>i</sub>*). The fact  
161 that F<sub>yw</sub>(*t<sub>i</sub>*) increases with Q(*t<sub>i</sub>*) is a result of the paper (not an assumption) as visible in  
162 Fig. 4 of the preprint (and consistent with results of Gallart et al. 2020b).

163 \*\* We are not referring to event water; we are referring to young water.

164 **\*\*\*Also, we do not understand what are the measurements you have seen: are you**  
165 **referring to the measurements of the three catchments reported in this manuscript? Are**  
166 **you referring to measurements of your study catchments? Are you referring to specific**  
167 **works published in literature? If so, it would be nice to know the temporal resolution of**  
168 **measurements you are referring to (is it the same as our data?) and to see what the**  
169 **boundary conditions of such measurements are (e.g., latitude, longitude, hydro-climatic**  
170 **regime, mean annual precipitation, geology, catchment area, mean catchment elevation,**  
171 **influence of human activities, presence of karst systems...) in order to have some concrete**  
172 **material for discussion.**

173 **Looking at daily  $Q$  and  $EC$  data of our three catchments it is clear that the dominant**  
174 **functioning is a decrease in  $ECs(t_i)$  if  $Q(t_i)$  increases and viceversa. This is visible from**  
175 **Fig. 2 of the preprint, but also from an in-depth analysis we did and that we report**  
176 **hereafter. Looking at what happens day-by-day in our data, we calculate the number of**  
177 **days in which to an increase in stream discharge corresponds a decrease in  $ECs$  (i.e.,**  
178  **$Q(t_{i+1}) - Q(t_i) > 0$  AND  $ECs(t_{i+1}) - ECs(t_i) < 0$  ) OR in which to a decrease in stream**  
179 **discharge corresponds an increase in  $ECs$  (i.e.,  $Q(t_{i+1}) - Q(t_i) < 0$  AND  $ECs(t_{i+1}) - ECs(t_i) >$**   
180  **$0$  ). Our results show that in 88%, 82% and 84% of the days at ERL, LUE and VOG**  
181 **catchments, respectively, we observe this functioning. When this is not true, we calculate**  
182 **the absolute difference in  $ECs$  in the two adjacent days (i.e.,  $ECs(t_{i+1}) - ECs(t_i)$ ). The**  
183 **frequency distributions of these differences reveal a third quartile of 10.9, 6.8 and 4.8**  
184  **$\mu S/cm$  for ERL, LUE and VOG, respectively. These are little differences if compared with**  
185 **the range of variation of  $ECs$  in these catchments, ranging from about 80  $\mu S/cm$  to 400**  
186  **$\mu S/cm$ .**

187 **According to these results, we overall agree that  $ECs$  does not decrease with increasing**  
188 **discharge at each time-step, but in our study catchments this happens only in a very**  
189 **limited number of days over a study period of about 5 years. Nevertheless, this fact does**  
190 **not affect the validity of Eq. (5) since we assume that  $ECs(t_i)$  decreases exponentially with**  
191 **increasing  $F_{yw}(t_i)$ , not with increasing  $Q(t_i)$ .**

192 **\*\*\*\*Hydrograph separation by using  $ECs$  has been applied in a previous study where**  
193  **$ECs$  decreases with increasing  $Q$  during both larger and smaller events (Cano-Paoli et al.**  
194 **2019), and not only during larger events.**

195 **In conclusion, we think that it is limiting to evaluate the goodness of our method by only**  
196 **considering its application in catchments studied during its own experience (of which we**  
197 **do not have any information). Indeed, the behavior of such catchments turned out to be**  
198 **different from other catchments studied in literature (e.g., Cano-Paoli et al. 2019) in**  
199 **which the method, as it is, could potentially work well (as in the three alpine catchments**  
200 **of our study).**

201 **The applicability of the method in catchments with different characteristics (e.g.,in karst**  
202 **systems with very soluble minerals or in catchments where  $ECs$  increases with  $Q$ ) is a**

203 possible future development of this work: at present, we have detailed the limitations of  
204 the *EXPECT* method by explaining the conditions in which it can work fine or badly.

205 5. I agree that catchments with a greater number of runoff events (i. e. more frequent  
206 higher discharge) likely have higher young water fraction. Therefore, I appreciate the idea  
207 of calibrating separated event/pre-event water components\* for all the events of period  
208 used to determine the young water fractions to estimate the proportion of “young water  
209 fractions” (see comment 2) in individual events\*\* . However, as I argue above, the EC  
210 does not provide the reliable information. Furthermore, I think that isotopes (atoms of  
211 elements forming water) and EC (ions of compounds saluted in water) may not provide the  
212 same (compatible) information about the streamwater sources. Last but not least, catchment  
213 runoff response is nonlinear. It is therefore questionable to assume that the young water  
214 fractions of individual events\*\* are proportional to distribution of the event water  
215 fractions.

216 **\*We are calibrating the young/old water EC endmembers**

217 **\*\*We are not looking at specific individual events: we are estimating daily (or sampling)  
218 young water fractions. In both cases we use daily  $Q$  and ECs data. To work at the event-  
219 scale, a finer (e.g., hourly) resolution data should be used.**

220 **Thank you for appreciating the idea of calibrating young/old water EC endmembers to  
221 estimate the young water fractions at each time step. However, we do not agree about the  
222 fact that ECs cannot provide reliable information. Of course, the use of ECs has some  
223 limitations, and it should be used with care (see section 3.3 of the preprint), but our results  
224 show the opposite of what you are saying. We have found consistency between the  $F_{yw}(Q)$   
225 relationship found by Gallart et al. 2020b (using only stable water isotopes  
226 measurements) and our  $F_{yw}(Q)$  relationship found by using both daily ECs measurements  
227 and average young water fractions (estimated with the amplitude ratio approach) to  
228 constrain the endmembers. Our results reveal a good compatibility of information.**

229 **Moreover, there are previous papers that conveniently used ECs and stable water  
230 isotopes obtaining coherent results (e.g., Cano-Paoli et al. 2019, Mosquera et al. 2018).  
231 Also, in a recent paper Riazi et al. (2022) said that water from different sources within  
232 the catchment is likely to have different ages. Hence, EC can potentially provide useful  
233 information on water age (lines 169-170 of the preprint).**

234 **Concluding, we report again the quote from Kirchner (2016b) about the synergic use of  
235 young water fraction and reactive chemical species:**

236 ***“The young water fraction  $F_{yw}$  may also be helpful in inferring chemical processes*  
237 *from streamflow concentrations of reactive chemical species. Many reactive species*  
238 *exhibit clear concentration–discharge relationships. Because one can determine how*  
239  *$F_{yw}$  varies, on average, across different ranges of discharge, one can potentially*  
240 *construct mixing relationships between  $F_{yw}$  and the concentrations of reactive***

241 *species. If the measurable range of  $F_{yw}$  is wide enough, one may even be able to*  
242 *estimate the end-member concentrations corresponding to idealized “young water”*  
243 *( $F_{yw} = 1$ ) and “old water” ( $F_{yw} = 0$ )”.*

244 **Please be clearer (e.g., indicate the lines of the manuscript) about the fact that we assume**  
245 **that “young water fractions of individual events are proportional to distribution of the**  
246 **event water fractions”. We did not make this assumption (or we do not understand what**  
247 **you are referring to).**

## 248 **References**

249 Cano-Paoli, K., Chiogna, G., and Bellin, A.: Convenient use of electrical conductivity  
250 measurements to investigate hydrological processes in Alpine headwaters, *Science of The*  
251 *Total Environment*, 685, 37–49, <https://doi.org/10.1016/j.scitotenv.2019.05.166>, 2019.

252 Gallart, F., Valiente, M., Llorens, P., Cayuela, C., Sprenger, M., and Latron, J.: Investigating  
253 young water fractions in a small Mediterranean mountain catchment: Both precipitation forcing  
254 and sampling frequency matter, *Hydrological Processes*, 34, 3618–3634,  
255 <https://doi.org/10.1002/hyp.13806>, 2020a.

256 Gallart, F., von Freyberg, J., Valiente, M., Kirchner, J. W., Llorens, P., and Latron, J.:  
257 Technical note: An improved discharge sensitivity metric for young water fractions, *Hydrology*  
258 *and Earth System Sciences*, 24, 1101–1107, <https://doi.org/10.5194/hess-24-1101-2020>,  
259 2020b.

260 Kirchner, J. W.: Aggregation in environmental systems-Part 2: Catchment mean transit times  
261 and young water fractions under hydrologic nonstationarity, *Hydrology and Earth System*  
262 *Sciences*, 20, 299–328, <https://doi.org/10.5194/hess-20-299-2016>, 2016.

263 Klaus, J. and McDonnell, J. J.: Hydrograph separation using stable isotopes: Review and  
264 evaluation, *Journal of Hydrology*, 505, 47–64, <https://doi.org/10.1016/j.jhydrol.2013.09.006>,  
265 2013.

266 Mosquera, G. M., Segura, C., and Crespo, P.: Flow Partitioning Modelling Using High-  
267 Resolution Isotopic and Electrical Conductivity Data, *Water*, 10, 904,  
268 <https://doi.org/10.3390/w10070904>, 2018.

269 Riazi, Z., Western, A. W., and Bende-Michl, U.: Modelling electrical conductivity variation  
270 using a travel time distribution approach in the Duck River catchment, Australia, *Hydrological*  
271 *Processes*, 36, e14721, <https://doi.org/10.1002/hyp.14721>, 2022.

272 von Freyberg, J., Allen, S. T., Seeger, S., Weiler, M., and Kirchner, J. W.: Sensitivity of young  
273 water fractions to hydro-climatic forcing and landscape properties across 22 Swiss catchments,  
274 *Hydrology and Earth System Sciences*, 22, 3841–3861, [https://doi.org/10.5194/hess-22-3841-](https://doi.org/10.5194/hess-22-3841-2018)  
275 2018, 2018.
